# Supplementary material for: Multiview learning for understanding functional multiomics
Source: PLoS Comput Biol. 2020 Apr 2;16(4):e1007677. doi: 10.1371/journal.pcbi.1007677 (PMC7117667; doi:10.1371/journal.pcbi.1007677)
Supplement: S1 Table — (XLSX) (XLSX) [file pcbi.1007677.s001.xlsx]

## Sheet: S1
Project	RNA-seq	miRNA-seq	ChIP-seq	ATAC-seq	Methylation	Genotype	Image	Application	website
ENCODE	x	x	x	x	x			Human cell lines	https://www.encodeproject.org
GTEx	x					x	x	Human tissue	https://www.gtexportal.org/home/
BrainSpan	x		x					Human brain development (multiple regions)	https://www.brainspan.org
PsychENCODE	x		x	x		x		Neuropsychiatric disorders	http://www.psychencode.org
ROSMAP	x		x		x	x	x	Alzheimer's disease	https://www.niagads.org/datasets/ng00029
Enigma						x	x	Human Brain imaging	http://enigma.ini.usc.edu
Kbase	x					x		plants, microbes	https://kbase.us/
